# Supplementary material
Source: PubMed Central journal article supplement (PMC5822717)

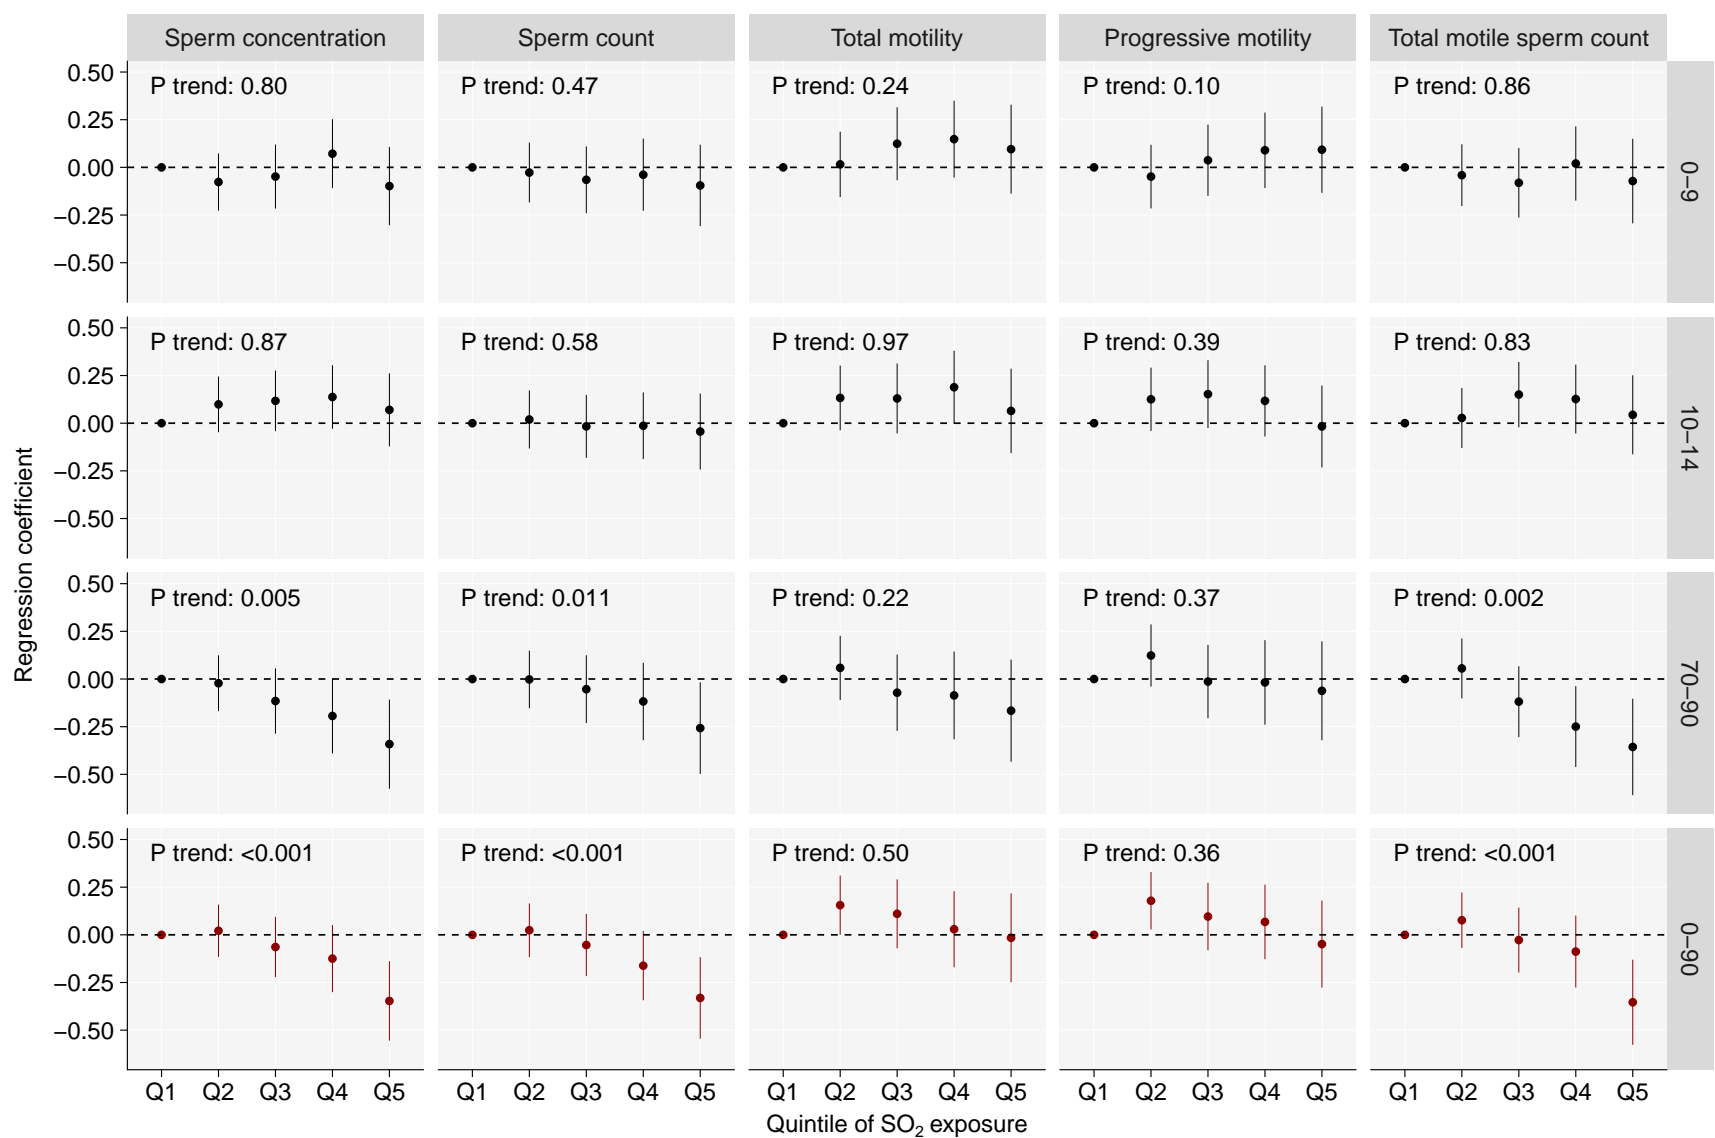

Supplement: NIHMS938748-supplement-Figure_S1.pdf [file NIHMS938748-supplement-Figure_S1.pdf]
